# Supplementary material for: Effects of microfluidization and thermal treatment on the characterization and digestion of curcumin loaded protein–polysaccharide–tea saponin complex nanoparticles
Source: Royal Society of Chemistry journal article supplement (doi:10.1039/d0fo02283g), 2020-12-21
Supplement: d0fo02283g1.pdf [file d0fo02283g1.pdf]

***Supplemental Material:***

***Effects of microfluidization and thermal treatment on characterization and digestion of curcumin loaded protein-polysaccharide-tea saponin complex nanoparticles***

*Yang Wei<sup>a, b</sup>, Chao Wang<sup>a</sup>, Xin Liu<sup>a</sup>, Wenyan Liao<sup>a</sup>, Liang Zhang<sup>a</sup>, Shuai Chen<sup>a</sup>,*

*Jin Fang Liu<sup>a</sup>, Like Mao<sup>a</sup>, Yanxiang Gao<sup>a\*</sup>*

*<sup>a</sup>College of Food Science & Nutritional Engineering, China Agricultural*

*University, Beijing, 100083, P. R. China*

*<sup>b</sup>Food Colloids and Processing Group, School of Food Science and Nutrition,*

*University of Leeds, Leeds LS2 9JT, UK*

\*Corresponding author.

Tel.: + 86-10-62737034

Fax: + 86-10-62737986

Address: Box 112, No.17 Qinghua East Road, Haidian District, Beijing 100083,

China

E-mail: gyxcau@126.com

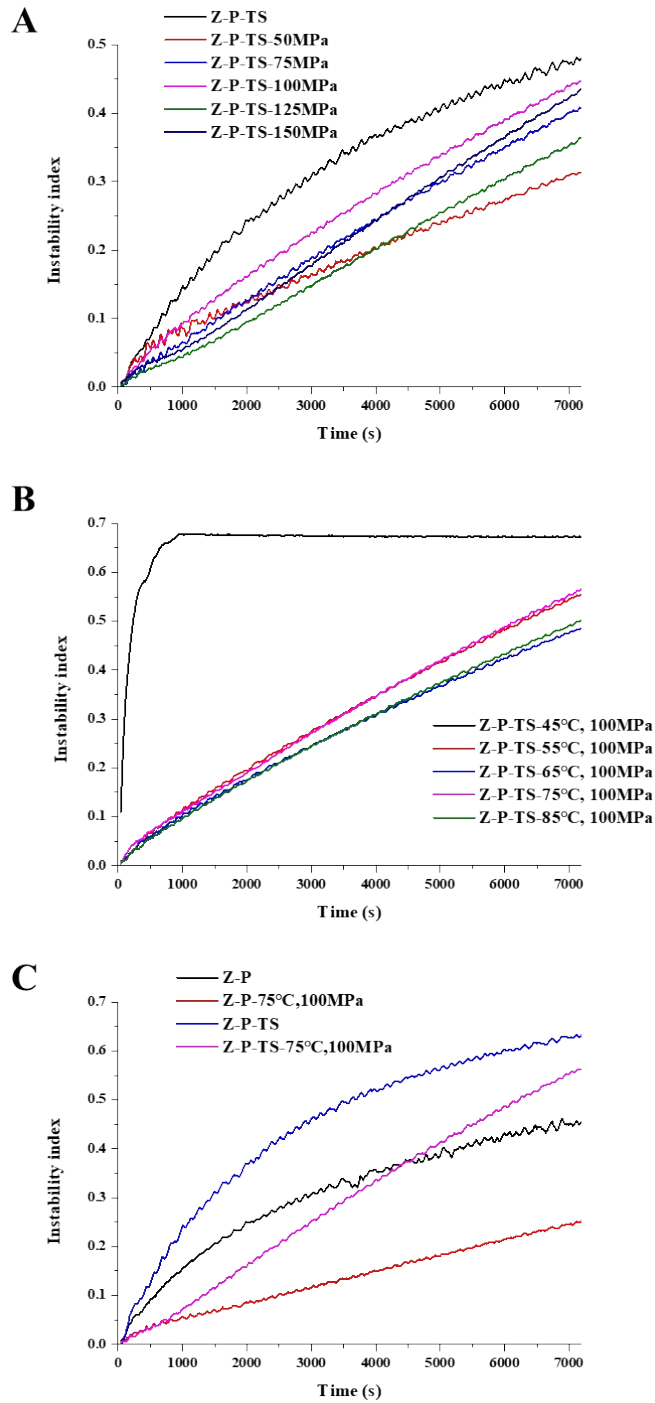

**Figure. S1** Effects of individual microfluidization pressure (D) and heating temperature (E) on physical stability of the complex nanoparticles and physical stability of control group (F).

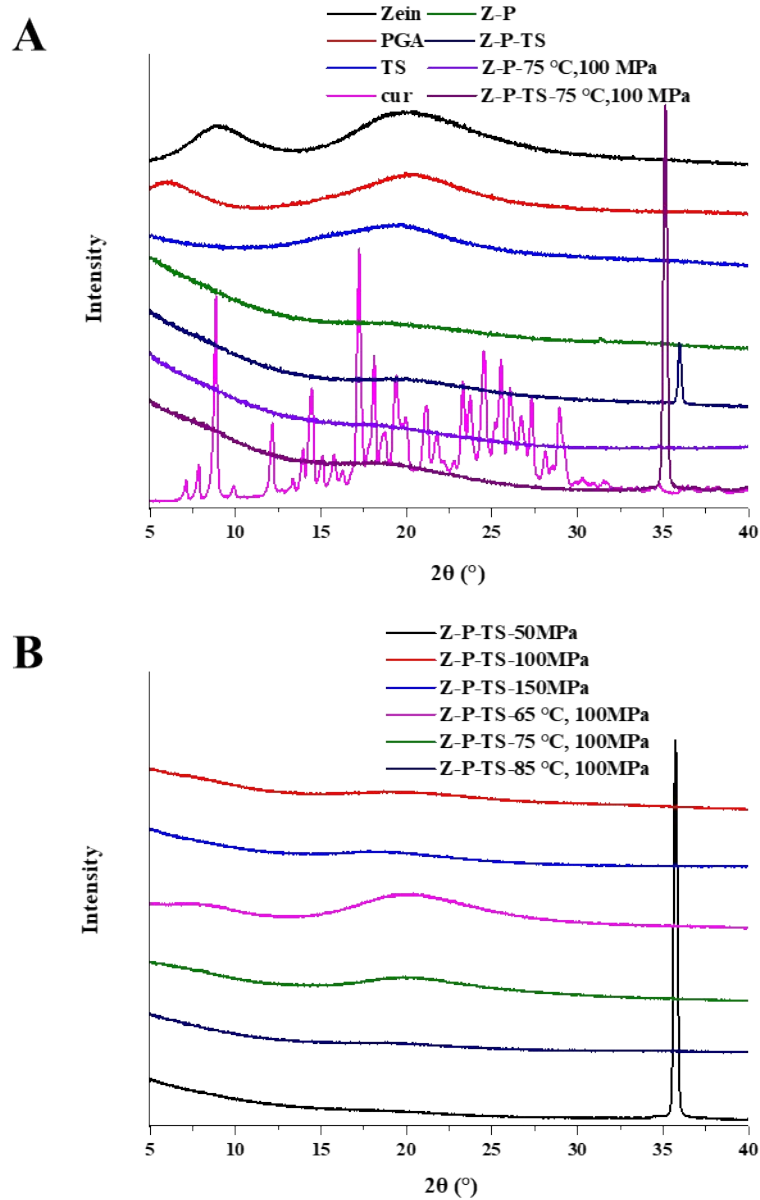

**Figure. S2** XRD spectra of individual component and complex nanoparticles in control group (A); effect of microfluidization pressure and heating temperature on the XRD spectra of zein-PGA-TS complex nanoparticles (B);
